# Supplementary material for: 6-hour Training in click-based echolocation changes practice in visual impairment professionals
Source: Front Rehabil Sci. 2023 May 22;4:1098624. doi: 10.3389/fresc.2023.1098624 (PMC10239887; doi:10.3389/fresc.2023.1098624)
Supplement: Supplementary file 1 [file Table1.xlsx]

## Sheet: Sheet1
participant number	Q1 Yes(1)/No(0) answer	Q2 text answer	coder1 session1	coder1 session 2	coder2 session1	coder2 session2	coder3 session1	coder3 session2	assigned code
1	1	I have more confidence and knowledge of the subject with the practical skills to put this in to practise. It has at least helped service users be more confident with their mobility and orientation of their surroundings.	1	1	1	1	3	3	1
2	1	I now discuss using echolocation right at the start of their long cane training. I inform them about what it entails, and give them options about how we can integrate it into their training.	3	3	3	3	3	3	3
3	1	I am more aware of peoples ability to echo locate even if they don't formerly do it and have asked two students if they would like to do your training I will pass your details on to her. >>Just an observation that especially those with no vision rely heavely on and have developed their haptic senses. I wondered how related this is to echo location without using the clicks. An example being someon…	2	2	1	1	2	2	2
4	1	The training was very useful as it certainly opened up new realms to explore with regards to signposting future service users to support/techniques to manage their conditions through the use of new skills. Currently within the role which I am working within, I have not yet been able to implement the knowledge I obtained, however should future courses/training be provided again in the future I wou…	1	1	1	1	2	2	1
5	1	Although it hasn't affected my practice yet, the service that I work within have just employed a new habilitation officer. It is our hope that we will be able to use our knowledge and enthusiasm of echolocation to the new officer and investigate further training so that she will then be able to include this within her work with some of CYP with VI.	0	0	1	1	1	0	0
6	1	The training has given me the confidence to work with and develop students’ confidence with echolocation. It has enabled me to lay building blocks with younger children that I can build upon as they develop and mature. The training has also provided me with training materials which are invaluable, I now have a clear structure to work through when supporting students. I now factor the training int…	3	3	3	3	3	3	3
7	1	I have felt more confident to introduce Echolocation to my students during O&M sessions >>I felt that the training was excellent and recommended it to colleagues.	3	3	3	3	3	3	3
8	1	Consideration to check/assess potential for use of echolocation ability as part of student assessments	1	1	0	0	1	0	0
9	1		0	0	0	0	0	0	0
10	1	It has given me a significant new aspect upon which to draw and which to provide for my clients for instruction. It is such a valuable tool which is, and will continue to be, so useful from now on. This is because your course gave me the confidence to try the techniques out myself. When I saw the success from them in such a short time this also gave confidence by which to pass the techniques on t…	3	3	3	3	3	3	3
11	1	It has given me a better understanding of echolocation which has helped me with one of my learners. I now understand how she uses this to navigate her surroundings. >>The day was very informative and I have come away with lots of useful information. The practical activities really gave me a clear understanding of how to use echolocation and the difficulties with this. Thoroughly enjoyed the day.	1	1	1	1	1	1	1
12	1	I have one lady who has been totally blind since birth and have introduced it to her. I found she was already good at sensing things around her even without clicking. I don't know how she does this but when we are out and about she will say to me 'are we near a wall?' She has tried one or two of the exercises you gave me ie the bowl in front of her. she says she has practised. However my time is …	3	3	3	3	3	3	3
13	1	I am currently working with a child with almost total vision loss and have started introducing the concept of echo location, this term some unexpected issues have arisen which have put the training back but she has shown some great results with early sessions. It has also raised my awareness again of echo location as a transferrable skill into other areas of life for the VI children we work with.	3	3	3	3	3	3	3
14	0	I am still training as a teacher of the visually impaired and my student do have some vision so I have fewer opportunities to put echolocation into practice. However, I could support more severely visually impaired students in the future. I found the training very interesting and useful for my own professional development. It has the potential to impact on my professional practice in the future.
15	1	It gives the VI more option skills when traveling to negotiate various environments. Some find building line endings much better and how far they need to go to find isolated buildings.	0	0	0	0	0	0	0
16	1	I think I have a greater understanding of the importance for VI children of trying to get a 3D impression of the world. This affects the way I work with children when doing mobility training but also in other areas, eg understanding tactile diagrams in subjects like Science and Maths.	3	3	3	3	3	3	3
17	1	I have now for some years worked with some pupils who can do this skill already. But been told not to practice it nor write about it on my mobility reports. However, since doing the short course I now practice this skill with my VI students. I really enjoyed the course and found it very useful as it enlightened me to the fact that it should be delivered as part of a mobility lesson if a student w…	3	3	3	3	3	3	3
18	1	I now understand about echolocation and how it could utilised by the students I work with alongside other mobility techniques and with a long cane. I am now open to the use of echolocation to aid mobility.	1	1	1	1	1	1	1
19	1	I work with young babies and children with VI, I have since the training, been able to recognise and been able to support young children with their emerging development of echolocation. >>The training was fascinating and has opened my eyes to Echolocation as an inherent skill for some of the young children I work with.	3	3	3	3	3	3	3
20	1	I started working on echo location with a blind student in September. Unfortunately due to a change in circumstances we have had to pause, but will resume in January.	3	3	3	3	3	3	3
21	1	I now focus much more on how sounds can inform mobility and I have practiced clicking and teaching clicking to two CYPs. >>The training was one of the best I have ever been too. thank you so much and I only hope you can reach many more people	3	3	3	3	3	3	3
22	1	A large part of my role is teaching orientation and mobility. I now have the confidence to teach Echolocation to my customers and have the knowledge and theory to explain the benefits of using sound to increase someone’s safety when mobilising.>>I was very impressed with the course and I know that my colleagues also got a lot from it and that we all want to use this with our clients. However, we …	3	3	3	3	3	3	3
23	1	As I am a new member to X’s VI team, Echo-location was something that I knew nothing about. Everything I learnt on the training day was incredible interesting. I am now aware that pupils on my caseload may use method echo-location to support their navigation of environment. I am able to talk to pupils about it and discuss ways in which I can support this such as not talking all the time that we a…	2	3	3	3	2	2	2
24	1	I found the training very useful and enjoyed the training very much and it certainly has widened by knowledge on this subject. After training, I am more confident that I would be able to support and teach the skills required to learn this technique. I feel more confident and knowledgeable talking to clients about echo location. I feel that if a client wanted to try out these skills I would be abl…	2	2	2	2	3	3	2
25	1	The training has provided an insight into the world of my 1:1. It has helped me understand what his world might be like using echolocation. Having the course provider teach me was a fantastic experience and skill to begin understand and learn. I had a fantastic training session.	1	1	1	1	1	1	1
26	1	Aware of how it can help with mobility and can highlight to service users if they are using it naturally and would then be able to explore this option further.	1	1	2	2	1	1	1
27	0
28	1	Some prior knowledge of the subject but much better after the training in how to produce the correct type of clicking, volume of clicking and the areas where efficient training can be done and with what products e.g. thinking of using walls and corners of rooms to develop ‘sound knowledge’. Using Perspex boards and bowls to help students identify objects through echolocation or not was really use…	1	1	1	1	1	1	1
29	1	I would say the training has impacted already on my professional work. I have several young people who are blind and severely visually impaired. My awareness of gauging space is different now that I have received the training and it is easy to get the very young children to hear my click and cross a room successfully. They seem to know where the wall is and reach out to the wall within arms reach…	3	3	3	3	3	3	3
30	1	The training helped with ideas for activities to develop the echo location skills. It gave me more confidence to incorporate the techniques during my mobility sessions.	3	3	3	3	3	3	3
31	1	I now particularly look for a way of encouraging use of hearing to help mobility even if this does not lead to continuing use of echo location.	2	2	2	2	3	3	2
32	1	I have become more aware of when it can be used and encourage people to do so when trying to relate themselves to specific landmarks on mobility routes. It has changed how I train with people.	3	3	3	3	3	3	3
33	1	– although my role does not involved working directly with our clients I have spoken to other organizations regarding Echolocation. I am exploring how we may work with yourselves and another organization to promote Echolocation to our clients.	1	2	2	2	1	2	2
34	1	Thank you so much for the training, it has been beneficial for me as a newly qualified professional as a Rehabilitation Worker for Visually impaired people (ROVI) absolutely. It has improved my knowledge and I have been able to impart that knowledge with staff and visually impaired people for them to consider Echolocation as an option. >> Since the training, I have discussed with staff how we cou…	2	2	2	2	2	2	2
35	1	It helped me reflect further on my practice with service users, the training was helpful for when preparing rehab programmes and lesson plans to meet the person’s individual needs.	3	3	3	3	3	3	3
36	1	It hasn’t changed my professional practice in what I do, however it has given the knowledge to know there is something else I can offer to a client if it would be appropriate. Without doing that training I wouldn’t have known what was possible so I feel it was extremely worth while	1	1	1	1	1	1	1
37	1	The echo location training has had a positive impact on my professional practise. I use the skills with the cyps I work with to help them locate what kind of area they are in.	3	3	3	3	3	3	3
38	1	While teaching I have been more aware of asking my CYPVI to practice their clicking and telling me what feedback they can hear. I am working outside at present with CYPVI, I am teaching them to identify buildings around them. It is early days, they are perfecting their click.I am also working on my own clicks and identifying corners, doors, buildings so i can teach the young children.	3	3	3	3	3	3	3
39	1	Learning more about echo-location has informed my practice when carrying out mobility training. It is now easier to explain to people how to use echo-location techniques and how they can interpret what they are hearing in order to enhance their independent mobility.	3	3	3	3	3	3	3
40	1	It has done as I now have enhanced insight into echolocation and feel able to describe it to my students and also understand where they are using it incidentally from ambient sounds such as cane tap and voices. I also am able to begin to introduce using clicks with students I feel are ready and use the practical exercises demonstrated to support their learning.	3	3	3	3	3	3	3
41	1	I have been much more aware of the environmental space around me and how it sounds in relation to not only mouth clicks, but to other noise input as well. This has had an impact on how I plan routes for the students and I now encourage them to identify sound clues and cues more than I would previously. I have started to implement the things learnt with some of my current students, they feel this …	3	3	3	3	3	3	3
42	1	Most definitely affected my professional practice in a positive way. I would now consider teaching echolocation alongside all the other competencies of mobility and orientation training in order to provide individuals with a range of skills that they can call upon to assist them with independent travel. I would feel confident in teaching the basic skills e.g. making the clear, bright click and bu…	3	3	3	3	3	3	3
43	1	I am a Habilitation Specialist and now teach elements of the echolocation training to my students. I now feel confident to implement the skills into my teaching practice and into children’s training programmes. My knowledge of echolocation, the theory, the practical skills, exercises for practising myself and for teaching have all increased significantly.	3	3	3	3	3	3	3
44	1	I WILL NOW CONSIDER USE OF ECHOLOCATION AS A SKILL FOR MY CLIENTS AS PART OF THEIR ASSESSMENT BECAUSE I FEEL CONFIDENT THAT I WOULD BE ABLE TO TEACH THEM THE BASICS AND SUPPORT THEIR SKILL DEVELOPMENT. I CAN NOW SEE THE BENEFITS OF ITS USE AND HOW ACHIEVEABLE SKILLS ARE.	1	1	1	1	1	1	1
45	1	It has changed the way I assess mobility and orientation i.e when on reconnaissance being aware of focusing on different sounds within the built environment	1	1	1	1	1	1	1
46	1	My professional practice has been enhanced with what I learnt on the training. It has enabled me to offer more choice to the people I am working with when teaching orientation. It has enabled me to tell people about this form of orientation when assessing them and finding out what their outcomes are.	3	3	3	3	3	3	3
47	1	The training was very useful as it certainly opened up new realms to explore with regards to signposting future service users to support/techniques to manage their conditions through the use of new skills. Currently within the role which I am working within, I have not yet been able to implement the knowledge I obtained, however should future courses/training be provided again in the future I wou…
48	1		0	0	0	0	0	0	0
49	1	I have better understanding and would feel able to teach others to use echolocation, I found it beneficial that I am able to adjust the training to peoples needs ie if a service user has hearing loss etc and it was beneficial to have a print out to show how to teach echolocation.	1	1	1	1	1	1	1
50	1	I now find it much clearer how to teach echo location and just as importantly how to build it into my teaching of orientation and mobility training. It is no longer a stand-alone piece. I integrate the training of both into one. >> refreshers and handbooks/PDF’s are always helpful.	3	3	3	3	3	3	3
51	1	I have a better understanding of how echolocation works and how to instruct people to use it. I have introduced 2 visually impaired children to the concept and have seen that there is potential for success if we continue with a training programme. The training I have received gave me confidence to do this.	3	3	3	3	3	3	3
52	1	Raised awareness of echo location and the opportunities it offers to mobility. >> I thought it was well paced, delivered with enthusiasm, excellent opportunity for practical experience, the delivery was well matched to the audience.	1	1	1	1	1	1	1
53	1	in that I'm more aware of sounds & echoes and this awareness is proving helpful with long cane student, who has no (reliable) useful vision. I haven't had time to explore how echolocation, as taught in your training, may be used. This is purely down to time - for me to learn more about how it can be used & the time involved in teaching these skills to a student. I hope this can happen as I'm sure…	1	1	1	1	1	1	1
54	1	I feel more confident to begin to teach and develop children on my caseload after identifying those for whom it would be appropriate. >> The training was excellent , targeted and effective. I would interested in any further sessions and any other literature that you produce as a result of your study. Thank you very much.	1	1	1	1	1	3	1
55	1	Prior to this training I found it challenging to approach the subject of echolocation on this level and it has been invaluable to learn some background as well as practical approaches to training and developing this skill with clients. It has also made me more aware of how this could assist in building up understanding of special awareness something that can be very challenging to teach. >> Unfor…	1	1	1	1	1	1	1
56	1	I can now make an effective click. I had to work hard to achieve it so feel I can empathise with those that don't find it easy to produce a click. I feel more confident in explaining the pro's of echolocating and it's use. I would be confident to encourage a child to learn to use it and promote it with others around them. >> I thought the training was well delivered and interesting. It would be n…	1	2	2	2	2	2	2
57	1	I have an increased understanding of developing awareness of space and objects without using vision. This has enhanced my understanding of how many students I support navigate their environments and given me more confidence when making recommendations. >> Thank you. It was one of the best training days I have attended and very relevant to my daily work.	2	2	2	2	2	2	2
58	1	Now feel more comfortable identifying areas echolocation can be used as part of a mobility package. >> Training was really useful, I knew about echolocation and how to use it (via Daniel Kish) but not how to teach it. Now I am teaching it.	3	3	3	3	3	3	3
59	1	I have known about Echolocation for years having worked in the VI sector since the late 1990s. However, I have never expected to be in the position where I could teach it to someone. Although I was unwell on the day and also unable to produce the correct ‘click’(something I’m working on!), I was amazed when watching my colleague walk towards a wall and stop himself before he walked into it. The p…	2	1	2	3	2	2	2
60	1	At this stage I have not been able to start work on echolocation as the child I particularly feel it would be useful for has needed work around his transition to secondary school to take priority. However it has made me more aware of what else we could potentially teach for all students and I am planning work on echolocation for this student when possible. >> I found it really useful and would be…	1	1	1	1	1	1	1
61	1	I am able to discuss the principals of echolocation with more confidence and build the basics of it into my mobility lessons. >> The day was very interesting and increased my knowledge, however, the full use of echolocation is still unlikely to be used by most clients.	3	3	3	3	3	3	3
62	1	Given a better insight to use of echo location. >> The course was very well-presented and informative. Thank you.	1	1	1	1	1	1	1
63	1	Training gave me an excellent insight into echolocation, its value as part of habilitation but also its limitations. I find that parents can become fixated with youtube clips where echolocation is sensationalised without any limitations being recognised. >> Only that the training was of huge benefit, it was an excellent mix of research and practical activities with fair and balanced views	0	0	1	1	1	1	1
64	1	Gave me a better understanding of how a Rehab worker would go about teaching a person and that it is a teachable skill (previously only read about this in textbooks). I work with individuals who has a visual impairment and a LD (90%) that would make teaching this skill challenging. However, I do have one individual who has a VI and LD who use eco location. I think it is self taught as he does not…	1	1	1	1	1	1	1
65	1	Yes to an extent. I was aware of echolocation as a specialised technique, but learnt more about how it is used at a more basic/spatial awareness level. This helped me to formalise and expand my understanding of how it could be taught/practiced/applied by me in my role as Hab Specialist. >> Just to re-confirm that I found the training very informative, well delivered, and structured (although I wa…	1	1	1	1	1	1	1
66	1	A greater awareness of Echo-location, what it is and how it can be used and developed by CYPVI. A general understanding of how to develop a CYPVI’s harnessing of this skill.	1	1	1	1	1	1	1
67	1	– I am now more fully aware of the benefits of Echolocation and how this can benefit a young person to learn independent travel techniques, both indoors and outdoors, and how this skill will enable them to become a more self-reliant and independent adult in the future. It really helped me gain an awareness how effective Echolocation can be and how to develop the necessary prerequisite skills to l…	1	1	1	1	1	1	1
68	1	The training has given me more confidence in teaching and training echolocation with visually impaired people. I also feel confident that I will be able to use the practical activities in order to implement the training. >> I thoroughly enjoyed the training and I would definitely recommend to my colleagues. I learnt a lot and really enjoyed the practical activities.	3	3	3	3	3	3	3
69	1	This training truly expanded my understanding and knowledge of echolocation as an additional mobility tool. The practical elements definitely allowed me to appreciate how the skills can compliment other mobility aids and brought together all the theory we covered in the first training sessions. The training also helped me to evaluate my teaching and gave me tips on how to complete mobility traini…	3	3	3	3	3	3	3
70	1	I found the training to be of great benefit to myself and have applied the knowledge to the students I currently work with.I have introduced Echolocation to all 10 of the students I am currently working with. Some have found it useful when in doors with fewer distractions to recognise the auditory feedback, some found it too difficult to master at this stage. I will persevere and continue to intr…	3	3	3	3	3	3	3
71	1	It has given me the knowledge, skills and confidence to include echolocation training in my training programs, which is what I am doing now.	3	3	3	3	3	3	3
72	1	I have been brave enough to try teaching some echolocation skills! I have supported a student to introduce some active echolocation into a route that he has been doing to a bus stop. This has helped him to locate a wall end that indicates the presence of a road.	3	3	3	3	3	3	3
73	1	The training made me more aware of the extent of echo location	1	1	1	1	1	1	1
74	1	I now have a better awareness of echolocation and how it is used. I am better able to explain the concept of echolocation to clients and professionals, and have used it in my mobility training sessions.	3	3	3	3	3	3	3
75	1	Having the opportunity to practise my own echolocation skills in a wider range of settings (including outdoor routes, etc.) gave me a much stronger understanding, from both student and teacher perspective, of how to effectively develop these skills. I found it very useful to participate in the exercises, then to immediately reflect on these through discussion with Lore and the other participants—…	3	3	3	3	3	3	3
76	1	Using theory and putting techniques into real life scenarios has given me a greater understanding.	1	1	1	1	1	1	1
77	1	• It has made me more aware of how echolocation can be used – indoors and outside. • Given me an insight of what can be achieved using echolocation. • Given me the understanding I require, to encourage children and young people with VI to explore their own ability to try echolocation. • Given me skills and techniques I use to help C & Y with VI to explore their own ability to try echolocation.	3	3	3	3	3	3	3
78	1	I have identified how someone is using environmental noise and the noise from his roller tip to use echolocation. I discussed and explained to this individual what I had observed and he was very interested. He said no one had picked this up before and he was unaware of how he uses this. It appears now that we have identified this he uses the skill even more to navigate and have an understanding o…	2	2	3	2	3	3	2
79	1	Has made me more aware of this technique and that it can be learnt later on in life.	1	1	1	1	1	1	1
80	1	I have been able to practise the learning for myself and in doing this it has made me more aware of what can be heard through echos. With my assessments for Deafblind people I am able now to offer Echo Location as an option (additional tool) for those people with sufficient residual hearing, when teaching mobility. >> Not at this time – I need to try to teach this with more people to then come ba…	3	3	3	3	3	3	3
81	1	It has greatly widened the strategies and techniques that I use and consider when doing both oriention and mobility. The use of echolocation techniques has given some clients lots more choice and control.	3	3	3	3	3	3	3
82	1	I am encouraging my VI students to listen and use sound to assist with their location in what ever form during orientation and mobility sessions	3	3	3	3	3	3	3
83	1	in a way. It has made me aware of echolocation and it’s uses but as yet I have not had an occasion in which to use it. As stated above I have not had an occasion to use it, however, I am currently attending a course at UCL and in the last module echolocation was involved, so it was useful with regards my participation.	1	1	1	1	1	1	1
84	1	I will try to be mindful of echo-location as an additional skill which CYPVIS can be made aware of and that in fact they are already using it. Also encourage further development of the skill	1	1	1	1	0	0	1
85	1	I am more perceptive to the way in which some of my younger children/those with additional needs are using sound in order to manoeuvre themselves around and navigate areas within the classroom/school when they have profound visual impairments (with no light/colour perception) and, either without a mobility aid or with minimal skills. I am also able to check on this by using some of your initial a…	3	3	3	3	3	3	3
86	1	I am now teaching this technique to a people who is already a competent cane user. I am not certain that I would integrate it into my orientation and mobility training from the very first session for a new client, as I think it would be quite difficult for the person to learn how to use a cane and be concentrated on echo-location. It has made me much more aware of the sonic environment, and I now…	3	3	3	3	3	3	3
87	1	I have not had the chance to put into practice the skills I learnt. However, with time I will be incorporating these within my planning. >> Could I have some information about activities to do with CYP on developing their echo-location skills (Primary age).	0	0	0	0	0	0	0
88	1	I have become more aware of the use of echolocation in students with VI and I am able to detect when students that I work with might be using echolocation to aid with their mobility and orientation. I can then use the strategies and activities that you suggested to aid in the use and development of these skills. I am also more confident in my ability to assess an environment and possible areas fo…	3	3	3	3	3	3	3
89	1	I can safely say that the echo-location training has enhanced my outdoor orientation and skills training in the following ways a) using the built environment and fixed landmarks much more to facilitate location in space and orientation towards locations. b) encouraging service users to develop perception skills to facilitate smoother transition both indoors and outdoors. c) better awareness and u…	3	3	3	3	3	3	3
90	1	Whilst furthering my understanding of echolocation, as yet I have had no reason to use it in my professional practice. At present the vision loss of those I support does not warrant it. >> I did find the course interesting and I shared our newly learnt skills with colleagues. I would feel confident in recommending it to other professionals, if I felt that it would be of benefit to the individuals.	2	2	2	2	2	2	2
91	1	It gave me a renewed confidence in the sequence of activities. It had been some time since I attended a 2 day master class with DK. I had been using very simple activities to develop the click and playing Electric wall games. Since the training I have refined and formalised my programmes. I particularly appreciated the theory aspects and felt the pace of the days allowed time to consolidate all t…	3	3	3	3	3	3	3
92	1	I have introduced the concept and some basic echolocation skills to a young boy of 7 who has no vision. He enjoyed it very much and, although I haven’t been able to continue the work due to a change in caseload, I know that he is continuing to develop his skills with his current habilitation specialist. I am going to be introducing the concept to a 16 year old girl who I have recently started to …	3	3	3	3	3	3	3
93	1	I am more aware of echolocation and so feel more confident in encouraging cyp with vi to listen more closely to changes in sounds and take account of the auditory feedback they receive from their environment during training.	3	3	3	3	3	3	3
94	1	I feel confident in encouraging children I work with to use/understand echolocation more than I did before.	2	3	3	2	2	2	2
95	1	For every VI child that I work with, especially when working on their mobility, I am constantly watching and listening for clicking or for them making any echo sounds and trying to work with it. X and I worked with one of my children, using some of the early exercises, as he had started clicking. This chid is MSI so I didn’t know if it would work or not! It was good working together with X to tri…	3	3	3	3	3	3	3
96	1	Overall I believe that the training has enabled me to consolidate my previous learning, i.e. echo location is an integral part of long cane training. Echo location should always be a key element of mobility training, whether through the cane or mouth or finger clicking.	0	0	1	0	1	1	0
97	1	Thinking about space as well as solid objects is just as important for people with VI. >> I enjoyed the training even though I was skeptical about it before hand. The different methods used were really interesting and to try it out for ourselves was great.	0	0	0	0	0	0	0
98	1	It did help with better awareness	1	1	1	1	1	1	1
99	1	It has made me look in to the use of echo location to support developing mobility. I appreciate more that this is a skill which will take practice to use and develop. >> Outside practical session would have been great.	1	1	1	1	1	1	1
100	1	I have started to discuss this with my students with more confidence and introduce it into more sessions. Although not a perfect exponent of the skill, I have been able to encourage several students to consider echo location where they had been using it passively before and explain it to them. I am incorporating examples from the training into my general practise. The course has been very useful	3	3	3	3	3	3	3
101	1	Making me more aware of which VI Children do use Echolocation in their orientation	1	1	1	1	1	1	1
102	1	More confident in using echo location	1	1	1	1	1	1	1
103	1	I haven’t used it much yet but been practising the skills in work	0	0	1	1	0	0	0
104	1	it improved my practice, but I still would like to be more confident in teaching Echolocation skills to clients	0	0	0	0	0	0	0
105	1	Carried out as part of orientation & mobility training that I carry out with service users. Tended to use with noise of cane or ambient noise reflecting back. E.g. to identify where a person is on a journey (bus shelter, going under a bridge). First workshop learnt how to ‘click’ and will start to introduce this in mobility training practice now.	1	1	1	1	1	3	1
106	1	Give an awareness to echolocation within a mobility training session, learn how to teach echolocation further to what I already learned on initial session.	1	1	1	1	1	1	1
